# Supplementary material for: High Viral Diversity and Mixed Infections in Cerebral Spinal Fluid From Cases of Varicella Zoster Virus Encephalitis
Source: PubMed Central journal article supplement (PMC6173578; doi:10.1093/infdis/jiy358), 2018-07-07
Supplement: jiy358_suppl_supplementary_tables.pdf [file jiy358_suppl_supplementary_tables.pdf]

| <b>VZV isolate / reference strain</b> | <b>Genbank ID</b> |
|---------------------------------------|-------------------|
| Dumas                                 | NC_001348         |
| HJ0                                   | AJ871403          |
| SD                                    | DQ479953          |
| SVETA                                 | EU154348          |
| BC                                    | AY548171          |
| M2DR                                  | DQ452050          |
| Var160                                | KC112914          |
| Bandim10                              | KM355704          |
| Bandim6                               | KM355701          |
| Bandim21                              | KM355715          |
| Var/Cli/UK/Ves/2403/2013              | KP771913          |
| Var/Cli/UK/BAL/2403/2013              |                   |
| Var/Cli/UK/Plasma/2403/2013           |                   |
| Var/Cli/UK/Ves/0803/2013              | KX262864          |
| Var/Cli/UK/Sputum/0603/2013           |                   |
| Var/Cli/UK/Plasma/0603/2013           |                   |
| Var/Cli/UK/CSF/2912/2012              | KP771908          |
| Var/Cli/UK/Ves/0201/2013              |                   |
| Var/Cli/Ves/UK/ZC/2017                | MG764313          |
| Var/Cli/Ves/UK/3323/2015              | MG764305          |
| Var/Cli/Ves/UK/9394/2015              | MG764308          |
| Var/Cli/Ves/UK/321/2015               | MG764307          |
| Var/Cli/BAL/UK/2402/2009              | KP771904          |
| Cli/UK/CSF/3009/2011                  | KP771890          |
| Cli/UK/CSF/2909/2011                  | KP771889          |
| KV6-2313                              | KP771901          |
| KV6-3127                              | KP771902          |
| KV8-1390                              | KP771903          |
| Zos/Cli/CSF/Sing/1008/2008            | KP771922          |
| Men/Cli/CSF/UK/UKM1018/2017           | MG764309          |
| Men/Cli/CSF/UK/UKM1211/2017           | MG764310          |
| Men/Cli/CSF/UK/UKM0338/2017           | MG764311          |
| Men/Cli/CSF/UK/UKM0624/2017           | MG764312          |
| Var/Cli/UK/CSF/0102/2013              | KP771907          |
| Var/Cli/UK/Ves/2203/2013              | KP771912          |
| Var/Cli/Ves/UK/724/2015               | MG764306          |
| DE10-567                              | KP771899          |
| DE10-581                              | KP771900          |
| DE10-1515                             | KP771891          |
| DE10-2660                             | KP771893          |
| DE10-2704                             | KP771894          |
| DE10-3378                             | KP771895          |
| DE10-4367                             | KP771896          |
| DE10-4582                             | KP771897          |
| DE10-5454                             | KP771898          |
| Var/Cli/Ves/Sing/1308/2008            | KP771919          |
| Var/Cli/Ves/Ger/31/2005               | KP771915          |
| Var/Cli/Ves/Ita/51/2006               | KP771918          |
| DE10-2480                             | KP771892          |

**Table S1: VZV isolates and reference strains used in this study for network phylogeny**

| Sample ID | % genome coverage at depth X |       |       | Mean read depth per base |
|-----------|------------------------------|-------|-------|--------------------------|
|           | 1X                           | 20X   | 100X  |                          |
| BAL2      | 99.75                        | 97.78 | 92.86 | 971                      |
| VES3      | 100.00                       | 99.82 | 98.52 | 1519                     |
| PLAS2     | 99.62                        | 97.33 | 75.37 | 275                      |
| VES2      | 100.00                       | 99.45 | 98.19 | 822                      |
| SPU       | 100.00                       | 99.00 | 97.72 | 1131                     |
| PLAS1     | 99.99                        | 99.35 | 98.13 | 1119                     |
| VES1      | 99.99                        | 99.05 | 97.82 | 1216                     |
| BAL1      | 99.99                        | 98.70 | 94.56 | 790                      |
| CSF3      | 99.83                        | 98.57 | 96.66 | 987                      |
| VES27     | 99.97                        | 98.98 | 97.70 | 972                      |
| CSF12     | 99.99                        | 98.95 | 97.78 | 980                      |
| VES26     | 99.97                        | 99.69 | 98.60 | 1298                     |
| VES4      | 99.97                        | 99.55 | 98.12 | 542                      |
| VES5      | 99.78                        | 99.03 | 97.12 | 337                      |
| PLAS3     | 99.52                        | 92.97 | 0.00  | 34                       |
| VES6      | 99.52                        | 96.79 | 0.21  | 50                       |
| VES25     | 99.94                        | 99.65 | 98.51 | 1322                     |
| VES9      | 99.87                        | 98.33 | 91.78 | 782                      |
| VES24     | 99.98                        | 99.71 | 98.65 | 1325                     |
| VES10     | 100.00                       | 99.84 | 98.95 | 1851                     |
| VES11     | 99.99                        | 99.47 | 98.37 | 1327                     |
| VES12     | 99.99                        | 99.62 | 98.62 | 1099                     |
| VES13     | 99.96                        | 99.48 | 98.31 | 1372                     |
| VES14     | 99.85                        | 99.16 | 96.46 | 549                      |
| VES15     | 99.97                        | 99.09 | 97.51 | 894                      |
| VES7      | 99.87                        | 98.59 | 91.32 | 534                      |
| VES8      | 99.85                        | 98.12 | 83.39 | 213                      |
| CSF4      | 100.00                       | 99.81 | 98.57 | 596                      |
| CSF5      | 100.00                       | 99.99 | 99.80 | 5206                     |
| CSF6      | 99.99                        | 99.88 | 99.41 | 3889                     |
| CSF2      | 99.95                        | 98.68 | 86.04 | 135                      |
| CSF1      | 99.96                        | 98.73 | 97.74 | 888                      |
| CSF7      | 99.84                        | 98.21 | 90.35 | 285                      |
| VES16     | 99.93                        | 99.16 | 97.67 | 892                      |
| VES17     | 99.99                        | 99.79 | 98.99 | 1500                     |
| VES23     | 100.00                       | 99.72 | 98.54 | 1018                     |
| CSF8      | 99.85                        | 97.51 | 21.30 | 78                       |
| CSF9      | 99.83                        | 99.24 | 96.85 | 324                      |
| CSF10     | 99.62                        | 96.75 | 1.06  | 54                       |
| CSF11     | 99.84                        | 99.12 | 95.94 | 213                      |
| VES20     | 99.88                        | 98.23 | 71.31 | 110                      |
| VES21     | 99.86                        | 98.97 | 97.53 | 492                      |
| VES18     | 98.46                        | 0.34  | 0.00  | 8                        |
| VES22     | 99.93                        | 99.14 | 97.74 | 544                      |
| VES19     | 99.77                        | 97.61 | 6.24  | 77                       |

**Table S2: Coverage metrics**
